# Supplementary material
Source: publisher site journal article supplement (https://www.degruyter.com/supplemental/journals/opli/opli-overview.xml/CFP_Language_and_Prejudice.pdf)
Supplement: Supplementary file 1 [file CFP_Language_and_Prejudice.pdf]

## LANGUAGE AND PREJUDICE

### GUEST EDITORS

---

**Mats Deutschmann**, School of Humanities, Education and Social Sciences, Örebro University

**Charish Halliburton**, School of Humanities, Education and Social Sciences, Örebro University

### DESCRIPTION

---

Prejudice is typically based on socially constructed ideas of identity, such as ethnicity, gender, sexuality, class, etc. Language bias and stereotyping (negative or positive) is a key component in this practice.

This special issue collects works presented during the “Language and Prejudice” symposium, held at Örebro University from 13 to 15 November 2019.

Presenters can submit papers on the following topics:

- ▶ Language discrimination/bias
- ▶ Language diversity and pedagogy
- ▶ Dialect/Accent Bias
- ▶ Language and immigration
- ▶ Cross-cultural aspects and language bias
- ▶ Intersectionality of identities and language
- ▶ Inherent bias built into language structures
- ▶ Language bias in policies and legislation

### HOW TO SUBMIT:

---

Authors are kindly invited to register at our paper processing system at:

<http://www.editorialmanager.com/opli/> and submit their contribution.

Every manuscript should be clearly marked as intended for this special issue. All papers will go through the Open Linguistics' high standards, quick, fair and comprehensive peer-review procedure. Instructions for authors are available [here](#). In case of any questions, please contact Guest Editor (GE EMAIL) or Managing Editor ([katarzyna.grzegorek@degruyter.com](mailto:katarzyna.grzegorek@degruyter.com)).

As an author of *Open Linguistics* you will benefit from:

- transparent, comprehensive and fast peer review managed by our esteemed Guest Editor;
- efficient route to fast-track publication and full advantage of De Gruyter e-technology;
- free language assistance for authors from non-English speaking regions.

The deadline for initial submission is January the 10th, 2020.
